# Supplementary material for: Anthocyanin-Rich Extract from Red Chinese Cabbage Alleviates Vascular Inflammation in Endothelial Cells and Apo E−/− Mice
Source: MDPI journal article supplement (doi:10.3390/ijms19030816), 2018-03-12
Supplement: s1 [file s1]

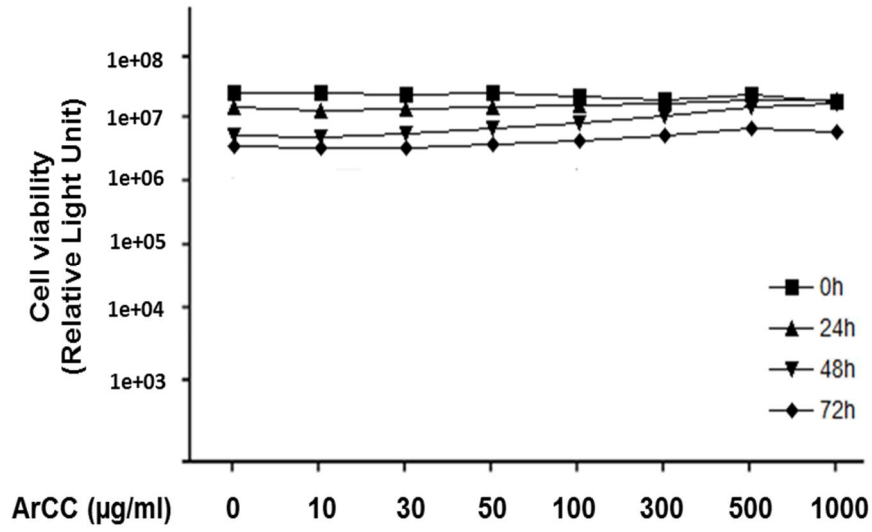

**Figure S1.** ArCC treatment did not cause reduction of viability at 10–1000 µg/mL in Stimulated Human Umbilical Vascular Endothelial Cells (HUVECs). The effect of the ArCC on HUVEC viability was determined using a bioluminescent assay and compared after 24, 48, and 72 h of treatment at the indicated concentrations in the presence of 15 ng/mL Tumor Necrosis Factor- $\alpha$  (TNF- $\alpha$ ). Data are presented as means  $\pm$  SEM ( $n = 3$ ). Similar results were observed in replicate experiments.
